# Supplementary material
Source: bioRxiv or medRxiv preprint supplement (https://www.biorxiv.org/highwire/filestream/92253/field_highwire_adjunct_files/0/299727-1.pdf)

# Supplementary Figure 1

**A**

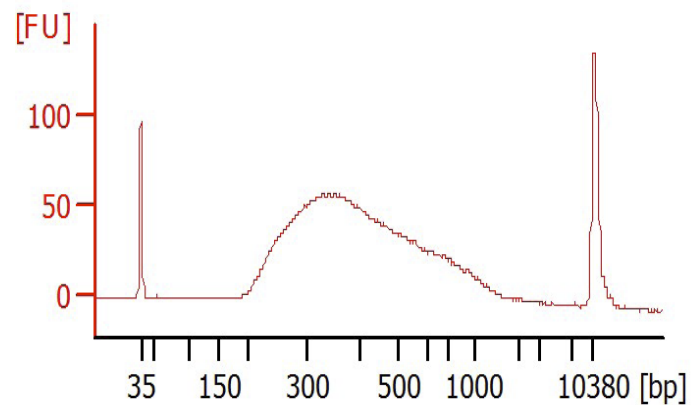

**B**

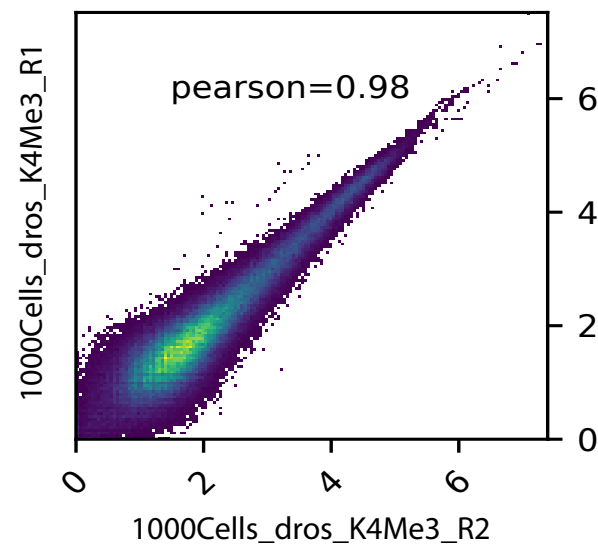

**C**

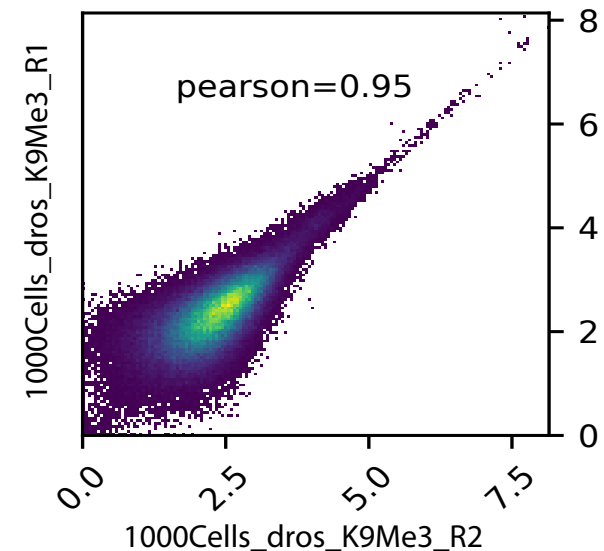

**D**

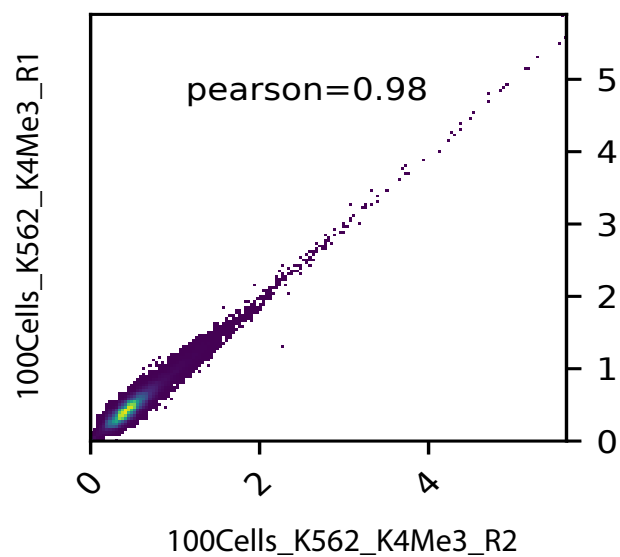

**E**

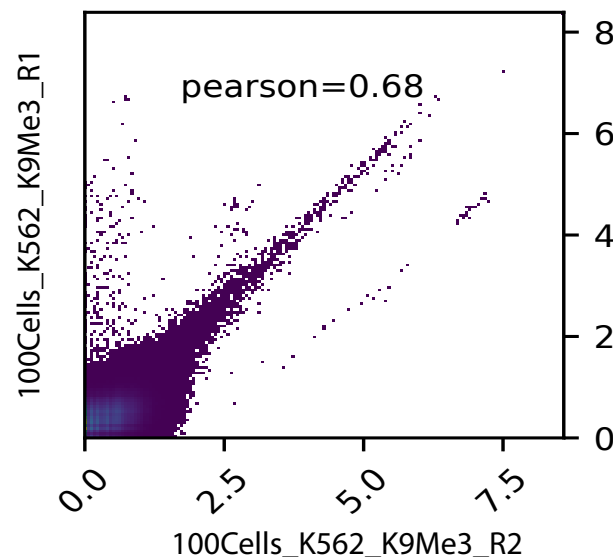

**G**

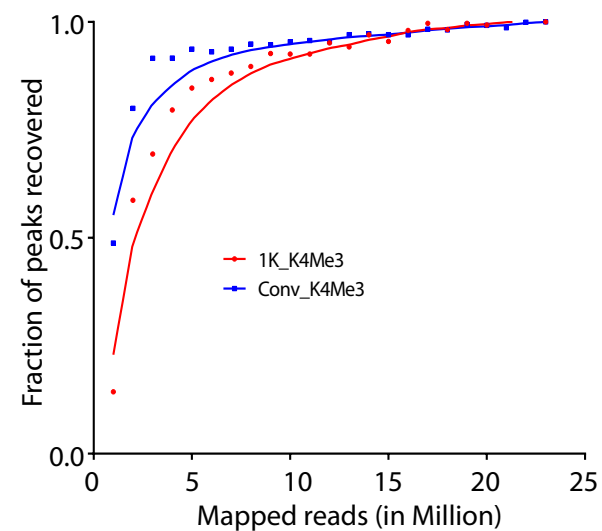

**F**

| Library               | Overall Alignment (%) | Uniquely Mapped (%) | Multiple Mapped (%) | Duplicates (%) |
|-----------------------|-----------------------|---------------------|---------------------|----------------|
| K4Me3_100cells_K562_1 | 99.12                 | 83.06               | 14.19               | 0.091632       |
| K4Me3_100cells_K562_2 | 98.67                 | 82.78               | 10.5                | 0.095607       |
| K9Me3_100cells_K562_1 | 99.09                 | 79.38               | 18.07               | 0.186757       |
| K9Me3_100cells_K562_2 | 99.08                 | 78.98               | 18.21               | 0.076646       |
| K4Me3_1K_dros_1       | 97.1                  | 82.67               | 11.57               | 0.481414       |
| K4Me3_1K_dros_2       | 97.61                 | 83.55               | 11.13               | 0.453763       |
| K9Me3_1K_dros_1       | 96.81                 | 60.77               | 32.91               | 0.149321       |
| K9Me3_1K_dros_2       | 97.25                 | 63.86               | 30.09               | 0.166462       |

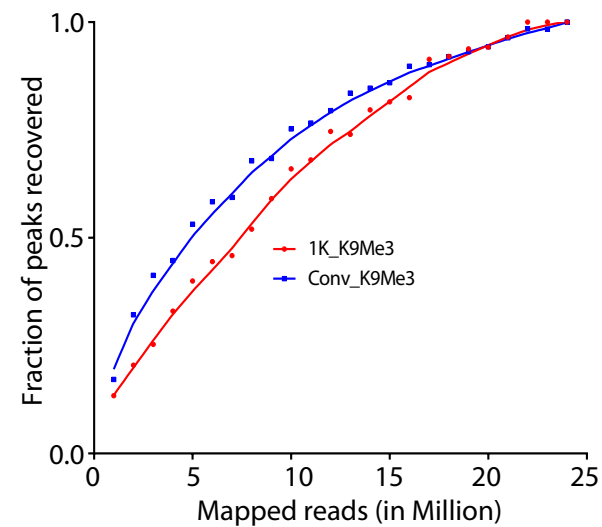

Supplement: Supplementary file [file 299727-1.pdf]
